# Supplementary material for: Single and Combined Effect of Mild-Heat Treatment and Alginate Coatings on Quality Preservation of Minimally Processed Bunching Green Onions
Source: MDPI journal article supplement (doi:10.3390/foods11050641), 2022-02-23
Supplement: s1 [file s1]

Supplementary material

# Single and combined effect of mild-heat treatment and alginate coatings on quality preservation of minimally processed bunching green onions

Carolina Medina-Jaramillo, Karen Usgame-Fagua, Nelson Franco-González and Alex López Córdoba \*

Grupo de Investigación en Bioeconomía y Sostenibilidad Agroalimentaria. Universidad Pedagógica y Tecnológica de Colombia. Facultad Seccional Duitama. Escuela de Administración de Empresas Agropecuarias. Carrera18 con Calle 22 Duitama, Boyacá, Colombia.

\* Correspondence: alex.lopez01@uptc.edu.co; Tel.: +57 8 7604100.

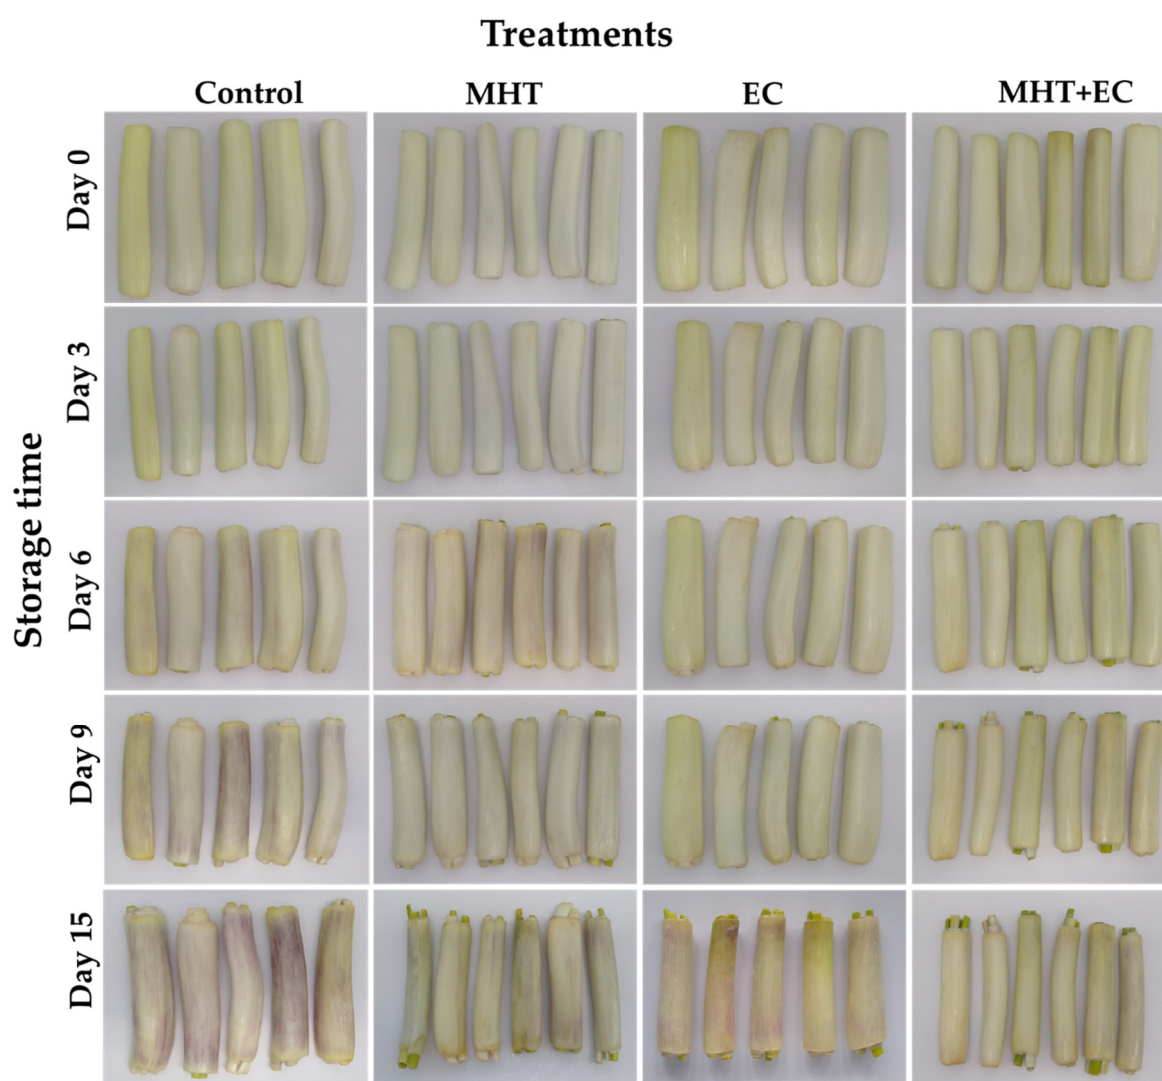

**Figure S1.** Images of control and treated minimally processed bunching green onion stored at 4°C for 15 days
